# Supplementary material
Source: PubMed Central journal article supplement (PMC11090390)
Supplement: apjcn-0032-0362-s01.pdf [file apjcn-0032-0362-s01.pdf]

**Supplementary Table 1.** Association of the TyG index, TG/HDL-C ratio, lipid parameters, and glycemic with hypertension by sex in Model 2 using generalised estimation equation model (GEE)<sup>†</sup>

| Variable              | Male<br>OR (95% CI) | <i>p</i> -value | Female<br>OR (95% CI) | <i>p</i> -value |
|-----------------------|---------------------|-----------------|-----------------------|-----------------|
| <b>TyG index</b>      |                     |                 |                       |                 |
| Q1                    | 1.0                 |                 | 1.0                   |                 |
| Q2                    | 1.30 (1.24-1.36)    | <0.001          | 1.32 (1.24-1.42)      | <0.001          |
| Q3                    | 1.65 (1.57-1.73)    | <0.001          | 1.71 (1.58-1.84)      | <0.001          |
| Q4                    | 2.12 (2.01-2.25)    | <0.001          | 2.42 (2.22-2.64)      | <0.001          |
| Q5                    | 3.04 (2.83-3.27)    | <0.001          | 4.08 (3.65-4.57)      | <0.001          |
| Per-1                 | 2.31 (2.20-2.43)    | <0.001          | 3.19 (2.94-3.45)      | <0.001          |
| <b>TG/HDL-C ratio</b> |                     |                 |                       |                 |
| Q1                    | 1.0                 |                 | 1.0                   |                 |
| Q2                    | 1.06 (1.02-1.11)    | 0.01            | 1.23 (1.16-1.31)      | <0.001          |
| Q3                    | 1.17 (1.11-1.22)    | <0.001          | 1.49 (1.39-1.60)      | <0.001          |
| Q4                    | 1.21 (1.15-1.27)    | <0.001          | 1.88 (1.75-2.03)      | <0.001          |
| Q5                    | 1.22 (1.16-1.29)    | <0.001          | 2.69 (2.47-2.93)      | <0.001          |
| Per-1                 | 1.06 (1.04-1.08)    | <0.001          | 1.54 (1.48-1.60)      | <0.001          |
| <b>TG, mmol/L</b>     |                     |                 |                       |                 |
| Q1                    | 1.0                 |                 | 1.0                   |                 |
| Q2                    | 1.06 (1.02-1.11)    | <0.001          | 1.13 (1.06-1.21)      | <0.001          |
| Q3                    | 1.20 (1.14-1.26)    | <0.001          | 1.32 (1.23-1.42)      | <0.001          |
| Q4                    | 1.35 (1.27-1.42)    | <0.001          | 1.63 (1.49-1.77)      | <0.001          |
| Q5                    | 1.48 (1.37-1.59)    | <0.001          | 2.02 (1.81-2.26)      | <0.001          |
| Per-1                 | 1.18 (1.14-1.22)    | <0.001          | 1.50 (1.41-1.61)      | <0.001          |
| <b>TC, mmol/L</b>     |                     |                 |                       |                 |
| Q1                    | 1.0                 |                 | 1.0                   |                 |
| Q2                    | 1.14 (1.08-1.19)    | <0.001          | 1.04 (0.96-1.12)      | 0.33            |
| Q3                    | 1.24 (1.17-1.32)    | <0.001          | 1.14 (1.04-1.25)      | 0.01            |
| Q4                    | 1.34 (1.24-1.45)    | <0.001          | 1.20 (1.07-1.34)      | <0.001          |
| Q5                    | 1.51 (1.36-1.67)    | <0.001          | 1.30 (1.12-1.50)      | <0.001          |
| Per-1                 | 1.72 (1.61-1.85)    | <0.001          | 1.27 (1.12-1.44)      | <0.001          |
| <b>LDL-C, mmol/L</b>  |                     |                 |                       |                 |
| Q1                    | 1.0                 |                 | 1.0                   |                 |
| Q2                    | 0.98 (0.94-1.02)    | 0.37            | 0.96 (0.89-1.02)      | 0.17            |
| Q3                    | 1.02 (0.97-1.07)    | 0.39            | 1.00 (0.93-1.07)      | 0.89            |
| Q4                    | 1.05 (1.00-1.10)    | 0.05            | 1.05 (0.98-1.13)      | 0.16            |
| Q5                    | 1.16 (1.10-1.22)    | <0.001          | 1.19 (1.11-1.28)      | <0.001          |
| Per-1                 | 1.07 (1.05-1.09)    | <0.001          | 1.10 (1.07-1.14)      | <0.001          |
| <b>HDL-C, mmol/L</b>  |                     |                 |                       |                 |
| Q1                    | 1.0                 |                 | 1.0                   |                 |
| Q2                    | 1.03 (0.99-1.08)    | 0.16            | 0.93 (0.86-1.00)      | 0.06            |
| Q3                    | 1.08 (1.02-1.13)    | 0.00            | 0.89 (0.81-0.97)      | 0.01            |
| Q4                    | 1.04 (0.98-1.10)    | 0.20            | 0.82 (0.74-0.91)      | <0.001          |
| Q5                    | 1.10 (1.02-1.18)    | 0.01            | 0.80 (0.71-0.91)      | <0.001          |
| Per-1                 | 1.26 (1.14-1.40)    | <0.001          | 0.80 (0.68-0.94)      | 0.01            |
| <b>FPG, mmol/L</b>    |                     |                 |                       |                 |
| Q1                    | 1.0                 |                 | 1.0                   |                 |
| Q2                    | 0.80 (0.77-0.84)    | <0.001          | 0.81 (0.76-0.87)      | <0.001          |
| Q3                    | 1.06 (1.02-1.11)    | <0.001          | 0.95 (0.89-1.01)      | 0.11            |
| Q4                    | 1.40 (1.34-1.46)    | <0.001          | 1.21 (1.13-1.29)      | <0.001          |
| Q5                    | 2.00 (1.91-2.10)    | <0.001          | 1.89 (1.77-2.03)      | <0.001          |
| Per-1                 | 1.05 (1.03-1.06)    | <0.001          | 1.08 (1.05-1.12)      | <0.001          |

TyG index: Triglyceride-glucos index; TG/HDL-C ratio: Triglyceride to high-density lipoprotein cholesterol ratio; TG: Triglyceride; TC: Total cholesterol; LDL-C: Low-density lipoprotein cholesterol; HDL-C: High-density lipoprotein cholesterol; FPG: Fasting plasma glucose.

<sup>†</sup>Model was adjusted for the variables of repeated years of medical check-up based on all medical check-up participants by using GEE. Model 2 was adjusted for age; center; body mass index; total cholesterol; total triglyceride; high-density lipoprotein cholesterol; low-density lipoprotein cholesterol; fasting plasma glucose; uric acid.

triglyceride-glucos index and the triglyceride to high-density lipoprotein cholesterol ratio

**Supplementary Table 2.** Association of the TyG index, TG/HDL-C ratio, lipid parameters, and glycemie with hypertension by age in Model 2 using generalised estimation equation model (GEE)<sup>†</sup>

| Variable              | <65 years<br>OR (95%CI) | <i>p</i> -value | ≥65 years<br>OR (95%CI) | <i>p</i> -value |
|-----------------------|-------------------------|-----------------|-------------------------|-----------------|
| <b>TyG index</b>      |                         |                 |                         |                 |
| Q1                    | 1.0                     |                 | 1.0                     |                 |
| Q2                    | 1.57 (1.50-1.65)        | <0.001          | 1.18 (1.06-1.31)        | <0.001          |
| Q3                    | 2.32 (2.20-2.44)        | <0.001          | 1.60 (1.41-1.81)        | <0.001          |
| Q4                    | 3.60 (3.41-3.80)        | <0.001          | 1.93 (1.65-2.24)        | <0.001          |
| Q5                    | 6.36 (5.97-6.79)        | <0.001          | 2.59 (2.10-3.20)        | <0.001          |
| Per-1                 | 4.34 (4.15-4.54)        | <0.001          | 2.41 (2.06-2.81)        | <0.001          |
| <b>TG/HDL-C ratio</b> |                         |                 |                         |                 |
| Q1                    | 1.0                     |                 | 1.0                     |                 |
| Q2                    | 1.42 (1.36-1.49)        | <0.001          | 1.09 (0.97-1.22)        | 0.15            |
| Q3                    | 1.80 (1.72-1.89)        | <0.001          | 1.19 (1.05-1.34)        | 0.01            |
| Q4                    | 2.27 (2.16-2.39)        | <0.001          | 1.13 (0.99-1.29)        | 0.06            |
| Q5                    | 2.51 (2.38-2.65)        | <0.001          | 1.30 (1.12-1.50)        | <0.001          |
| Per-1                 | 1.27 (1.24-1.29)        | <0.001          | 1.07 (1.00-1.15)        | 0.06            |
| <b>TG, mmol/L</b>     |                         |                 |                         |                 |
| Q1                    | 1.0                     |                 | 1.0                     |                 |
| Q2                    | 1.31 (1.25-1.36)        | <0.001          | 1.02 (0.91-1.14)        | 0.71            |
| Q3                    | 1.67 (1.59-1.75)        | <0.001          | 1.07 (0.94-1.22)        | 0.28            |
| Q4                    | 2.15 (2.04-2.26)        | <0.001          | 1.21 (1.04-1.42)        | 0.02            |
| Q5                    | 2.61 (2.45-2.77)        | <0.001          | 1.16 (0.93-1.43)        | 0.19            |
| Per-1                 | 1.45 (1.41-1.50)        | <0.001          | 1.13 (0.98-1.31)        | 0.08            |
| <b>TC, mmol/L</b>     |                         |                 |                         |                 |
| Q1                    | 1.0                     |                 | 1.0                     |                 |
| Q2                    | 1.07 (1.02-1.11)        | <0.001          | 0.96 (0.83-1.10)        | 0.53            |
| Q3                    | 1.19 (1.13-1.26)        | <0.001          | 0.92 (0.77-1.11)        | 0.41            |
| Q4                    | 1.32 (1.23-1.41)        | <0.001          | 0.88 (0.69-1.12)        | 0.30            |
| Q5                    | 1.60 (1.46-1.75)        | <0.001          | 0.77 (0.56-1.07)        | 0.12            |
| Per-1                 | 1.69 (1.58-1.81)        | <0.001          | 1.35 (1.01-1.80)        | 0.04            |
| <b>LDL-C, mmol/L</b>  |                         |                 |                         |                 |
| Q1                    | 1.0                     |                 | 1.0                     |                 |
| Q2                    | 0.96 (0.93-1.00)        | 0.03            | 1.11 (0.98-1.25)        | 0.10            |
| Q3                    | 1.09 (1.05-1.13)        | <0.001          | 1.03 (0.91-1.16)        | 0.69            |
| Q4                    | 1.25 (1.20-1.29)        | <0.001          | 1.09 (0.96-1.23)        | 0.19            |
| Q5                    | 1.64 (1.57-1.70)        | <0.001          | 1.16 (1.01-1.32)        | 0.04            |
| Per-1                 | 1.27 (1.25-1.30)        | <0.001          | 1.05 (1.00-1.10)        | 0.05            |
| <b>HDL-C, mmol/L</b>  |                         |                 |                         |                 |
| Q1                    | 1.0                     |                 | 1.0                     |                 |
| Q2                    | 1.12 (1.08-1.16)        | <0.001          | 1.27 (1.11-1.45)        | <0.001          |
| Q3                    | 1.12 (1.07-1.17)        | <0.001          | 1.20 (1.03-1.40)        | 0.02            |
| Q4                    | 1.11 (1.05-1.17)        | <0.001          | 1.16 (0.97-1.39)        | 0.10            |
| Q5                    | 1.08 (1.01-1.16)        | 0.03            | 1.02 (0.81-1.28)        | 0.88            |
| Per-1                 | 1.09 (1.00-1.19)        | 0.06            | 0.99 (0.71-1.39)        | 0.97            |
| <b>FPG, mmol/L</b>    |                         |                 |                         |                 |
| Q1                    | 1.0                     |                 | 1.0                     |                 |
| Q2                    | 0.70 (0.67-0.73)        | <0.001          | 0.55 (0.49-0.62)        | <0.001          |
| Q3                    | 0.89 (0.86-0.92)        | <0.001          | 0.76 (0.67-0.87)        | <0.001          |
| Q4                    | 1.25 (1.21-1.30)        | <0.001          | 1.02 (0.89-1.16)        | 0.80            |
| Q5                    | 2.35 (2.27-2.45)        | <0.001          | 1.11 (0.97-1.27)        | 0.12            |
| Per-1                 | 1.11 (1.09-1.13)        | <0.001          | 0.96 (0.93-0.99)        | <0.001          |

TyG index: Triglyceride-glucos index; TG/HDL-C ratio: Triglyceride to high-density lipoprotein cholesterol ratio; TG: Triglyceride; TC: Total cholesterol, LDL-C: Low-density lipoprotein cholesterol, HDL-C: High-density lipoprotein cholesterol, FPG: Fasting plasma glucose.

<sup>†</sup>Model was adjusted for the variables of repeated years of medical check-up based on all medical check-up participants by using GEE. Model 2 was adjusted for gender; center; body mass index; total cholesterol; total triglyceride; high-density lipoprotein cholesterol; low-density lipoprotein cholesterol; fasting plasma glucose; uric acid.

**Supplementary Table 3.** Association of the TyG index, TG/HDL-C ratio, lipid parameters, and glycemic with hypertension by sex in Model 2 using generalised estimation equation model (GEE)<sup>†</sup>

| Variable       | <28 kg/m <sup>2</sup><br>OR (95% CI) | <i>p</i> -value | ≥ 28 kg/m <sup>2</sup><br>OR (95% CI) | <i>p</i> -value |
|----------------|--------------------------------------|-----------------|---------------------------------------|-----------------|
| TyG index      |                                      |                 |                                       |                 |
| Q1             | 1.0                                  |                 | 1.0                                   |                 |
| Q2             | 1.35 (1.29-1.42)                     | <0.001          | 1.56 (1.43-1.69)                      | <0.001          |
| Q3             | 1.75 (1.67-1.85)                     | <0.001          | 1.99 (1.80-2.19)                      | <0.001          |
| Q4             | 2.45 (2.32-2.59)                     | <0.001          | 2.47 (2.19-2.78)                      | <0.001          |
| Q5             | 3.80 (3.56-4.05)                     | <0.001          | 3.62 (3.06-4.30)                      | <0.001          |
| Per-1          | 2.95 (2.82-3.09)                     | <0.001          | 3.04 (2.69-3.43)                      | <0.001          |
| TG/HDL-C ratio |                                      |                 |                                       |                 |
| Q1             | 1.0                                  |                 | 1.0                                   |                 |
| Q2             | 1.36 (1.30-1.42)                     | <0.001          | 1.23 (1.14-1.33)                      | <0.001          |
| Q3             | 1.71 (1.63-1.80)                     | <0.001          | 1.38 (1.26-1.51)                      | <0.001          |
| Q4             | 2.24 (2.13-2.35)                     | <0.001          | 1.36 (1.24-1.50)                      | <0.001          |
| Q5             | 2.79 (2.65-2.94)                     | <0.001          | 1.32 (1.17-1.48)                      | <0.001          |
| Per-1          | 1.41 (1.38-1.44)                     | <0.001          | 1.09 (1.04-1.14)                      | <0.001          |
| TG, mmol/L     |                                      |                 |                                       |                 |
| Q1             | 1.0                                  |                 | 1.0                                   |                 |
| Q2             | 1.13 (1.08-1.18)                     | <0.001          | 1.32 (1.21-1.43)                      | <0.001          |
| Q3             | 1.31 (1.25-1.38)                     | <0.001          | 1.40 (1.27-1.55)                      | <0.001          |
| Q4             | 1.58 (1.50-1.66)                     | <0.001          | 1.51 (1.34-1.70)                      | <0.001          |
| Q5             | 1.86 (1.75-1.98)                     | <0.001          | 1.47 (1.25-1.74)                      | <0.001          |
| Per-1          | 1.25 (1.21-1.29)                     | <0.001          | 1.18 (1.08-1.28)                      | <0.001          |
| TC, mmol/L     |                                      |                 |                                       |                 |
| Q1             | 1.0                                  |                 | 1.0                                   |                 |
| Q2             | 1.11 (1.06-1.16)                     | <0.001          | 1.13 (1.02-1.25)                      | 0.02            |
| Q3             | 1.26 (1.19-1.33)                     | <0.001          | 1.25 (1.10-1.43)                      | <0.001          |
| Q4             | 1.38 (1.29-1.47)                     | <0.001          | 1.35 (1.13-1.60)                      | <0.001          |
| Q5             | 1.63 (1.49-1.78)                     | <0.001          | 1.36 (1.07-1.72)                      | 0.01            |
| Per-1          | 2.17 (2.03-2.31)                     | <0.001          | 1.60 (1.33-1.91)                      | <0.001          |
| LDL-C, mmol/L  |                                      |                 |                                       |                 |
| Q1             | 1.0                                  |                 | 1.0                                   |                 |
| Q2             | 0.95 (0.92-0.99)                     | 0.02            | 1.10 (1.01-1.20)                      | 0.03            |
| Q3             | 1.02 (0.98-1.06)                     | 0.31            | 1.11 (1.01-1.21)                      | 0.03            |
| Q4             | 1.09 (1.05-1.14)                     | <0.001          | 1.27 (1.16-1.39)                      | <0.001          |
| Q5             | 1.28 (1.23-1.34)                     | <0.001          | 1.36 (1.24-1.51)                      | <0.001          |
| Per-1          | 1.14 (1.12-1.16)                     | <0.001          | 1.14 (1.10-1.19)                      | <0.001          |
| HDL-C, mmol/L  |                                      |                 |                                       |                 |
| Q1             | 1.0                                  |                 | 1.0                                   |                 |
| Q2             | 0.99 (0.95-1.03)                     | 0.61            | 1.11 (1.01-1.22)                      | 0.02            |
| Q3             | 0.90 (0.86-0.94)                     | <0.001          | 1.10 (0.99-1.21)                      | 0.08            |
| Q4             | 0.77 (0.73-0.82)                     | <0.001          | 1.14 (1.02-1.28)                      | 0.02            |
| Q5             | 0.63 (0.59-0.68)                     | <0.001          | 1.12 (0.97-1.30)                      | 0.11            |
| Per-1          | 0.50 (0.46-0.55)                     | <0.001          | 1.05 (0.82-1.33)                      | 0.71            |
| FPG, mmol/L    |                                      |                 |                                       |                 |
| Q1             | 1.0                                  |                 | 1.0                                   |                 |
| Q2             | 0.78 (0.74-0.81)                     | <0.001          | 1.11 (1.01-1.22)                      | <0.001          |
| Q3             | 0.99 (0.95-1.03)                     | 0.63            | 1.10 (0.99-1.21)                      | 0.20            |
| Q4             | 1.34 (1.29-1.39)                     | <0.001          | 1.14 (1.02-1.28)                      | <0.001          |
| Q5             | 2.15 (2.06-2.23)                     | <0.001          | 1.12 (0.97-1.30)                      | <0.001          |
| Per-1          | 1.11 (1.09-1.13)                     | <0.001          | 0.98 (0.96-1.01)                      | 0.18            |

TyG index: Triglyceride-glucos index; TG/HDL-C ratio: Triglyceride to high-density lipoprotein cholesterol ratio; TG: Triglyceride; TC: Total cholesterol, LDL-C: Low-density lipoprotein cholesterol, HDL-C: High-density lipoprotein cholesterol, FPG: Fasting plasma glucose.

<sup>†</sup>Model was adjusted for the variables of repeated years of medical check-up based on all medical check-up participants by using GEE. Model 2 was adjusted for age, gender; center; total cholesterol; total triglyceride; high-density lipoprotein cholesterol; low-density lipoprotein cholesterol; fasting plasma glucose; uric acid
